# Supplementary material for: A panel of blood-derived miRNAs with a stable expression pattern as a potential pan-cancer detection signature
Source: Front Mol Biosci. 2022 Dec 15;9:1030749. doi: 10.3389/fmolb.2022.1030749 (PMC9798419; doi:10.3389/fmolb.2022.1030749)
Supplement: Supplementary file 2 [file DataSheet2.xlsx]

## Sheet: literature review
miRNA	Title	Reference
miR-148	Diagnostic value of microRNA-148/152 family in non-small-cell lung cancer (NSCLC): A systematic review and meta-analysis.	hsa-mir-148 Long Cheng, Guobo Du et al. (2021) Medicine (Baltimore)
	miR-148b: Expression of the miR-148/152 Family in Acute Myeloid Leukemia and its Clinical Significance.	Xiao-Xue Wang, Yan Li et al. (2017) Med Sci Monit
	miR-148b: The role of the miR-148/-152 family in physiology and disease.	Michael Friedrich, Barbara Seliger et al. (2017) Eur J Immunol
	miR-148b: Circulating miR-148/152 family as potential biomarkers in hepatocellular carcinoma.	Feng Wang, Shukui Wang et al. (2016) Tumour Biol
	Down-expression of circulating micro ribonucleic acid (miRNA)-148/152 family in plasma samples of non-small cell lung cancer patients.	Ming-Xiang Huang (2016) J Cancer Res Ther
	microRNA-148b: Downregulated microRNA-148b in circulating PBMCs in chronic myeloid leukemia patients with undetectable minimal residual disease: a possible biomarker to discontinue imatinib safely.	Junko H Ohyashiki, Kazuma Ohyashiki et al. (2014) Drug Des Devel Ther
let-7d	The Role of microRNA let-7d in Female Malignancies and Diseases of the Female Reproductive Tract.	Doaa Mamdouh Aly, Mona Mohsen Abdullatif et al. (2020) Asian Pac J Cancer Prev
	let-7d: The Expression and Significance of the Plasma Let-7 Family in Anti-N-methyl-D-aspartate Receptor Encephalitis.	Doaa Mamdouh Aly, Mona Mohsen Abdullatif et al. (2020) Asian Pac J Cancer Prev
	let-7d: Serum microRNA let-7a-1/let-7d/let-7f and miRNA 143/145 Gene Expression Profiles as Potential Biomarkers in HCV Induced Hepatocellular Carcinoma.	Chiara De Santis, Martin Gأ¶tte (2021) Int J Mol Sci
mir-421	miR-30c: MiR-421 and miR-30c inhibit SERPINE 1 gene expression in human endothelial cells.	Alexandre Marchand, David-Alexandre Trأ©gouأ«t et al. (2012) PLoS One
miR-340	hsa-miR-340-5p: Analysis of microRNAs in Exosomes of Breast Cancer Patients in Search of Molecular Prognostic Factors in Brain Metastases.	hsa-mir-340 Carolin J Curtaz, Malgorzata Burek et al. (2022) Int J Mol Sci
	Non-Exosomal and Exosome-Derived miRNAs as Promising Biomarkers in Canine Mammary Cancer.	Patrأ­cia Petrouإ،kovأ،, Dasa Cizkova et al. (2022) Life (Basel)
	miR-340-5p: Blood small extracellular vesicles derived miRNAs to differentiate pancreatic ductal adenocarcinoma from chronic pancreatitis.	Shiwei Guo, Gang Jin et al. (2021) Clin Transl Med
	miR-340-5p: Differential Expression of miRNA in the Peripheral Blood Mononuclear Cells in Myasthenia Gravis with Muscle-Specific Receptor Tyrosine Kinase Antibodies.	Ying Tan, Yuzhou Guan et al. (2021) Crit Rev Eukaryot Gene Expr
	MiR-340-5p: MiRNA-340-5p mediates the functional and infiltrative promotion of tumor-infiltrating CD8+ T lymphocytes in human diffuse large B cell lymphoma.	Yangyang Xu, Aibin Liang et al. (2020) J Exp Clin Cancer Res
	miR-340-5p: YY1-mediated overexpression of long noncoding RNA MCM3AP-AS1 accelerates angiogenesis and progression in lung cancer by targeting miR-340-5p/KPNA4 axis.	Xuemei Li, Caiyong Yang et al. (2020) J Cell Biochem
	miR-340-5p: Circulating Exosomal MicroRNA-1307-5p as a Predictor for Metastasis in Patients with Hepatocellular Carcinoma.	Jung Woo Eun, Jae Youn Cheong et al. (2020) Cancers (Basel)
	miR-340-5p: Human CD8+ CD25 + CD127 low regulatory T cells: microRNA signature and impact on TGF-خ² and IL-10 expression.	Redouane Rouas, Hussein Fayyad-Kazan et al. (2019) J Cell Physiol
	miR-340-5p: Deep sequencing of circulating exosomal microRNA allows non-invasive glioblastoma diagnosis.	Saeideh Ebrahimkhani, Kimberley L Kaufman et al. (2018) NPJ Precis Oncol
	miR-340p: Up-regulation of microRNA-340 promotes osteosarcoma cell apoptosis while suppressing proliferation, migration, and invasion by inactivating the CTNNB1-mediated Notch signaling pathway.	Bao-Long Pan, Jun-Long Liao et al. (2018) Biosci Rep
	Replenishing exosomes from older bone marrow stromal cells with miR-340 inhibits myeloma-related angiogenesis.	Tomohiro Umezu, Junko H Ohyashiki et al. (2017) Blood Adv
	Extracellular vesicles released by hepatocytes from gastric infusion model of alcoholic liver disease contain a MicroRNA barcode that can be detected in blood.	Akiko Eguchi, Ariel E Feldstein et al. (2017) Hepatology
	miR-340-5p: The Serum Expression of Selected miRNAs in Pulmonary Sarcoidosis with/without Lأ¶fgren's Syndrome.	Eva Novosadova, Zdenka Navratilova et al. (2016) Mediators Inflamm
	MiRNA microarray reveals specific expression in the peripheral blood of glioblastoma patients.	Lun Dong, Hengzhu Zhang et al. (2014) Int J Oncol
miR-142
	The clinical significance of circulating miR-21, miR-142, miR-143, and miR-146a in patients with prostate cancer.	The clinical significance of circulating miR-21, miR-142, miR-143, and miR-146a in patients with prostate cancer.
	CircWAC induces chemotherapeutic resistance in triple-negative breast cancer by targeting miR-142, upregulating WWP1 and activating the PI3K/AKT pathway.	CircWAC induces chemotherapeutic resistance in triple-negative breast cancer by targeting miR-142, upregulating WWP1 and activating the PI3K/AKT pathway.
	miR-142-3p: Hematopoietic cell-mediated dissemination of murine cytomegalovirus is regulated by NK cells and immune evasion.	miR-142-3p: Hematopoietic cell-mediated dissemination of murine cytomegalovirus is regulated by NK cells and immune evasion.
	miR-142-3p: Deciphering microRNA-mRNA regulatory network in adult T-cell leukemia/lymphoma; the battle between oncogenes and anti-oncogenes.	miR-142-3p: Deciphering microRNA-mRNA regulatory network in adult T-cell leukemia/lymphoma; the battle between oncogenes and anti-oncogenes.
	miR142: Tumor extracellular vesicles loaded with exogenous Let-7i and miR-142 can modulate both immune response and tumor microenvironment to initiate a powerful anti-tumor response.	miR142: Tumor extracellular vesicles loaded with exogenous Let-7i and miR-142 can modulate both immune response and tumor microenvironment to initiate a powerful anti-tumor response.
	MicroRNA-142 Critically Regulates Group 2 Innate Lymphoid Cell Homeostasis and Function.	MicroRNA-142 Critically Regulates Group 2 Innate Lymphoid Cell Homeostasis and Function.
	miR-142-3p: Predictive Value of Circulating miRNAs in Lymph Node Metastasis for Colon Cancer.	miR-142-3p: Predictive Value of Circulating miRNAs in Lymph Node Metastasis for Colon Cancer.
	Dominant regulation of long-term allograft survival is mediated by microRNA-142.	Dominant regulation of long-term allograft survival is mediated by microRNA-142.
	Involvement of miR-142 and miR-155 in Non-Infectious Complications of CVID.	Involvement of miR-142 and miR-155 in Non-Infectious Complications of CVID.
	miR-142-3p: Serum level of miR-142-3p predicts prognostic outcome for colorectal cancer following curative resection.	miR-142-3p: Serum level of miR-142-3p predicts prognostic outcome for colorectal cancer following curative resection.
	miR-142-3p: MiR-142-3p as a novel biomarker for predicting poor prognosis in renal cell carcinoma patients after surgery.	miR-142-3p: MiR-142-3p as a novel biomarker for predicting poor prognosis in renal cell carcinoma patients after surgery.
	miR-142-3p: Circulating miR-29c, miR-30c, miR-193a-5p and miR-885-5p: Novel potential biomarkers for HTLV-1 infection diagnosis.	miR-142-3p: Circulating miR-29c, miR-30c, miR-193a-5p and miR-885-5p: Novel potential biomarkers for HTLV-1 infection diagnosis.
	Artesunate promotes Th1 differentiation from CD4+ T cells to enhance cell apoptosis in ovarian cancer via miR-142.	Artesunate promotes Th1 differentiation from CD4+ T cells to enhance cell apoptosis in ovarian cancer via miR-142.
	MicroRNA modified tumor-derived exosomes as novel tools for maturation of dendritic cells.	MicroRNA modified tumor-derived exosomes as novel tools for maturation of dendritic cells.
	miR-142-3p: MiR-142-3p Inhibits the Metastasis of Hepatocellular Carcinoma Cells by Regulating HMGB1 Gene Expression.	miR-142-3p: MiR-142-3p Inhibits the Metastasis of Hepatocellular Carcinoma Cells by Regulating HMGB1 Gene Expression.
	miR-142-3p: Regulatory T cell-derived extracellular vesicles modify dendritic cell function.	miR-142-3p: Regulatory T cell-derived extracellular vesicles modify dendritic cell function.
	miR-142-3p: Identifying characteristic miRNAs-genes and risk pathways of multiple sclerosis based on bioinformatics analysis.	miR-142-3p: Identifying characteristic miRNAs-genes and risk pathways of multiple sclerosis based on bioinformatics analysis.
	miR-142-3p: Differential expression of miRNA199b-5p as a novel biomarker for sporadic and hereditary parathyroid tumors.	miR-142-3p: Differential expression of miRNA199b-5p as a novel biomarker for sporadic and hereditary parathyroid tumors.
	miR-142-3p: MiR-142-3p regulates autophagy by targeting ATG16L1 in thymic-derived regulatory T cell (tTreg).	miR-142-3p: MiR-142-3p regulates autophagy by targeting ATG16L1 in thymic-derived regulatory T cell (tTreg).
	miR-142-3p: Exosomal miRNA Signatures for Late-Onset Acute Graft-Versus-Host Disease in Allogenic Hematopoietic Stem Cell Transplantation.	miR-142-3p: Exosomal miRNA Signatures for Late-Onset Acute Graft-Versus-Host Disease in Allogenic Hematopoietic Stem Cell Transplantation.
	Differential expression of miRNAs in the seminal plasma and serum of testicular cancer patients.	Differential expression of miRNAs in the seminal plasma and serum of testicular cancer patients.
	miR-142-3p: Selective secretion of microRNAs from lung cancer cells via extracellular vesicles promotes CAMK1D-mediated tube formation in endothelial cells.	miR-142-3p: Selective secretion of microRNAs from lung cancer cells via extracellular vesicles promotes CAMK1D-mediated tube formation in endothelial cells.
	miR-142-3p: A viral Sm-class RNA base-pairs with mRNAs and recruits microRNAs to inhibit apoptosis.	miR-142-3p: A viral Sm-class RNA base-pairs with mRNAs and recruits microRNAs to inhibit apoptosis.
	miR-142-3p: Hepatic miR-126 is a potential plasma biomarker for detection of hepatitis B virus infected hepatocellular carcinoma.	miR-142-3p: Hepatic miR-126 is a potential plasma biomarker for detection of hepatitis B virus infected hepatocellular carcinoma.
	miR-142-5p: RBM3 regulates temperature sensitive miR-142-5p and miR-143 (thermomiRs), which target immune genes and control fever.	miR-142-5p: RBM3 regulates temperature sensitive miR-142-5p and miR-143 (thermomiRs), which target immune genes and control fever.
	miR-142-3p: Efficient detection of human circulating tumor cells without significant production of false-positive cells by a novel conditionally replicating adenovirus.	miR-142-3p: Efficient detection of human circulating tumor cells without significant production of false-positive cells by a novel conditionally replicating adenovirus.
	miR-142-3p: [Elevated levels of dendritic cell-correlated miRNAs in ascites and sera of patients with ovarian cancer].	miR-142-3p: [Elevated levels of dendritic cell-correlated miRNAs in ascites and sera of patients with ovarian cancer].
	miR-142-3p: CSF1-ETS2-induced microRNA in myeloid cells promote metastatic tumor growth.	miR-142-3p: CSF1-ETS2-induced microRNA in myeloid cells promote metastatic tumor growth.
	miR-142-3p: The PTEN-AKT-mTOR/RICTOR Pathway in Nasal Natural Killer Cell Lymphoma Is Activated by miR-494-3p via PTEN But Inhibited by miR-142-3p via RICTOR.	miR-142-3p: The PTEN-AKT-mTOR/RICTOR Pathway in Nasal Natural Killer Cell Lymphoma Is Activated by miR-494-3p via PTEN But Inhibited by miR-142-3p via RICTOR.
	miR-142-3p: Circulating microRNAs as prognostic therapy biomarkers in head and neck cancer patients.	miR-142-3p: Circulating microRNAs as prognostic therapy biomarkers in head and neck cancer patients.
	miR-142-3p: Propofol exerts anti-hepatocellular carcinoma by microvesicle-mediated transfer of miR-142-3p from macrophage to cancer cells.	miR-142-3p: Propofol exerts anti-hepatocellular carcinoma by microvesicle-mediated transfer of miR-142-3p from macrophage to cancer cells.
	miR-142-3p: MicroRNA expression in early mycosis fungoides is distinctly different from atopic dermatitis and advanced cutaneous T-cell lymphoma.	miR-142-3p: MicroRNA expression in early mycosis fungoides is distinctly different from atopic dermatitis and advanced cutaneous T-cell lymphoma.
	miR-142-3p: U6 is not a suitable endogenous control for the quantification of circulating microRNAs.	miR-142-3p: U6 is not a suitable endogenous control for the quantification of circulating microRNAs.
	Gamma-retroviral vector design for the co-expression of artificial microRNAs and therapeutic proteins.	Gamma-retroviral vector design for the co-expression of artificial microRNAs and therapeutic proteins.
	miR-142-3p: MiR-142 orchestrates a network of actin cytoskeleton regulators during megakaryopoiesis.	miR-142-3p: MiR-142 orchestrates a network of actin cytoskeleton regulators during megakaryopoiesis.
	miR-142-3p: Effect of miR-142-3p on the M2 macrophage and therapeutic efficacy against murine glioblastoma.	miR-142-3p: Effect of miR-142-3p on the M2 macrophage and therapeutic efficacy against murine glioblastoma.
	miR-142-3p: Serum miR-142-3p is associated with early relapse in operable lung adenocarcinoma patients.	miR-142-3p: Serum miR-142-3p is associated with early relapse in operable lung adenocarcinoma patients.
	miR-142-3p: MiR-142-3p prevents macrophage differentiation during cancer-induced myelopoiesis.	miR-142-3p: MiR-142-3p prevents macrophage differentiation during cancer-induced myelopoiesis.
	miR-142-3p: [Development of a detection system for circulating tumor cells in peripheral blood using a next generation conditionally-replicating adenovirus].	miR-142-3p: [Development of a detection system for circulating tumor cells in peripheral blood using a next generation conditionally-replicating adenovirus].
	miR-142-3p: A role for miR-142-3p in colony-stimulating factor 1-induced monocyte differentiation into macrophages.	miR-142-3p: A role for miR-142-3p in colony-stimulating factor 1-induced monocyte differentiation into macrophages.
	miR-142-3p: MicroRNA-29a and microRNA-142-3p are regulators of myeloid differentiation and acute myeloid leukemia.	miR-142-3p: MicroRNA-29a and microRNA-142-3p are regulators of myeloid differentiation and acute myeloid leukemia.
	miR-142-3p: MiR-29a and miR-142-3p downregulation and diagnostic implication in human acute myeloid leukemia.	miR-142-3p: MiR-29a and miR-142-3p downregulation and diagnostic implication in human acute myeloid leukemia.
	miR-142-3p: Targeting of microRNA-142-3p in dendritic cells regulates endotoxin-induced mortality.	miR-142-3p: Targeting of microRNA-142-3p in dendritic cells regulates endotoxin-induced mortality.
	miR-142-3p: MicroRNA expression profile and identification of miR-29 as a prognostic marker and pathogenetic factor by targeting CDK6 in mantle cell lymphoma.	miR-142-3p: MicroRNA expression profile and identification of miR-29 as a prognostic marker and pathogenetic factor by targeting CDK6 in mantle cell lymphoma.
	miR-142-3p: Selective depletion of CD4+CD25+Foxp3+ regulatory T cells by low-dose cyclophosphamide is explained by reduced intracellular ATP levels.	miR-142-3p: Selective depletion of CD4+CD25+Foxp3+ regulatory T cells by low-dose cyclophosphamide is explained by reduced intracellular ATP levels.
	MicroRNAs as regulators of mammalian hematopoiesis.	MicroRNAs as regulators of mammalian hematopoiesis.
	Deregulation of microRNA involved in hematopoiesis and the immune response in HTLV-I adult T-cell leukemia.	Deregulation of microRNA involved in hematopoiesis and the immune response in HTLV-I adult T-cell leukemia.
mir-223	Role of MicroRNA-223 and MicroRNA-182 as Novel Biomarkers in Early Detection of Colorectal Cancer.	hsa-mir-223 Hala A Mahmoud, Wael Abd Elgwad Elsewify et al. (2022) Int J Gen Med
	MiRNAs in lung cancer. A systematic review identifies predictive and prognostic miRNA candidates for precision medicine in lung cancer.	Shen Zhong, Jأ¼rgen Borlak et al. (2021) Transl Res
	MicroRNA-223 in gastrointestinal cancers: A systematic review and diagnostic meta-analysis.	Amir Hossein Aalami, Amirhossein Sahebkar et al. (2021) Eur J Clin Invest
	Evaluation of microRNA-223 and microRNA-125a expression association with STAT3 and Bcl2 genes in blood leukocytes of CLL patients: a case-control study.	Nader Davari, Zari Tahannejad Asadi et al. (2021) BMC Res Notes
	hsa-mir-223: Epigenetics and expression of key genes associated with cardiac fibrosis: NLRP3, MMP2, MMP9, CCN2/CTGF and AGT.	Sruti Chandra, Melanie Ehrlich et al. (2021) Epigenomics
	Candidate RNA biomarkers in biofluids for early diagnosis of ovarian cancer: A systematic review.	Eva Hulstaert, Pieter Mestdagh et al. (2021) Gynecol Oncol
	Serum levels of miR-223 but not miR-21 are decreased in patients with neuroendocrine tumors.	Teresa Hellberg, Burcin أ–zdirik et al. (2020) PLoS One
	The Association between Inflammatory Cytokines and miRNAs with Slow Coronary Flow Phenomenon.	Shahla Danaii, Mehdi Yousefi et al. (2020) Iran J Allergy Asthma Immunol
	Serum miRNAs associated with tumor-promoting cytokines in non-small cell lung cancer.	Pichitpon Chaniad, Pritsana Raungrut et al. (2020) PLoS One
	Autoantibodies against tumor-associated antigens combined with microRNAs in detecting esophageal squamous cell carcinoma.	Guiying Sun, Jianying Zhang et al. (2020) Cancer Med
	A pan-inflammatory microRNA-cluster is associated with orbital non-Hodgkin lymphoma and idiopathic orbital inflammation.	Kamil G Laban, Jonas J W Kuiper et al. (2020) Eur J Immunol
	The protective role of miR-223 in sepsis-induced mortality.	Dan Liu, Lixin Xie et al. (2020) Sci Rep
	Evaluation of the Diagnostic Properties of Serum hsa-miR-223-5p in the Detection of Gastric Cancer: A Case-Control Study.	Amir H Aalami, Amirhossein Sahebkar et al. (2020) Anticancer Agents Med Chem
	Emerging circulating MiRNAs and LncRNAs in upper gastrointestinal cancers.	Esmat Abdi, Zahra Taherian-Esfahani et al. (2020) Expert Rev Mol Diagn
	Low serum miR-223 expression predicts poor outcome in patients with acute myeloid leukemia.	Guopan Yu, Dan Xu et al. (2020) J Clin Lab Anal
	hsa-miR-223-5p: Evaluation of the Diagnostic Properties of Serum hsa-miR-223-5p in the Detection of Gastric Cancer: A Case-Control Study.	Amir H Aalami, Amirhossein Sahebkar et al. (2020) Anticancer Agents Med Chem
	hsa-miR-223: In Silico Transcriptomic Analysis of Wound-Healing-Associated Genes in Malignant Pleural Mesothelioma.	Erasmia Rouka, Sotirios G Zarogiannis et al. (2019) Medicina (Kaunas)
	MiR-223: The non-coding RNome after splenectomy.	Mihnea P Dragomir, Catalin Vasilescu et al. (2019) J Cell Mol Med
	Polyunsaturated fatty acids modulate the delivery of platelet microvesicle-derived microRNAs into human breast cancer cell lines.	Valeria Gasperi, Maria Valeria Catani et al. (2019) J Nutr Biochem
	Serum miR-223: A Validated Biomarker for Detection of Early-Stage Non-Small Cell Lung Cancer.	Paola D'Antona, Paola Campomenosi et al. (2019) Cancer Epidemiol Biomarkers Prev
	Neutrophil-derived miR-223 as local biomarker of bacterial peritonitis.	Amy C Brook, Matthias Eberl et al. (2019) Sci Rep
	MicroRNA in leukemia: Tumor suppressors and oncogenes with prognostic potential.	Rajab Mardani, Hossein Pourghadamyari et al. (2019) J Cell Physiol
	Extracellular vesicle-associated miRNAs in ovarian cancer - design of an integrated NGS-based workflow for the identification of blood-based biomarkers for platinum-resistance.	Jan Dominik Kuhlmann, Sabine Kasimir-Bauer et al. (2019) Clin Chem Lab Med
	Monitoring of platelet function parameters and microRNA expression levels in patients with prostate cancer treated with volumetric modulated arc radiotherapy.	Nurten Bahtiyar, Mehmet Can Akyolcu et al. (2018) Oncol Lett
	Circulating plasma microRNAs in the detection of esophageal squamous cell carcinoma.	Lu Zhang, Jianying Zhang et al. (2018) Oncol Lett
	Exosomal microRNAs as tumor markers in epithelial ovarian cancer.	Chi Pan, Heidi Schwarzenbach et al. (2018) Mol Oncol
	Serum microRNA signatures and metabolomics have high diagnostic value in colorectal cancer using two novel methods.	Hai-Ning Liu, Xi-Zhong Shen et al. (2018) Cancer Sci
	Ultrasensitive Detection of Serum MicroRNA Using Branched DNA-Based SERS Platform Combining Simultaneous Detection of خ±-Fetoprotein for Early Diagnosis of Liver Cancer.	Linxiu Cheng, Yuliang Zhao et al. (2018) ACS Appl Mater Interfaces
	Prognostic Value of MicroRNAs in Esophageal Carcinoma: A Meta-Analysis.	Song Gao, Rong Wu et al. (2018) Clin Transl Gastroenterol
	MiR-223 is repressed and correlates with inferior clinical features in mantle cell lymphoma through targeting SOX11.	Keshu Zhou, Lugui Qiu et al. (2018) Exp Hematol
	Pilot Study of Whole Blood MicroRNAs as Potential Tools for Diffuse Low-Grade Gliomas Detection.	Catherine Gozأ©, Hugues Duffau et al. (2018) Cell Mol Neurobiol
	MicroRNA-223 Suppresses the Canonical NF-خ؛B Pathway in Basal Keratinocytes to Dampen Neutrophilic Inflammation.	Wenqing Zhou, Qing Deng et al. (2018) Cell Rep
	Exosome-Encapsulated microRNAs as Potential Circulating Biomarkers in Colon Cancer.	Mina Hosseini, Amir Avan et al. (2017) Curr Pharm Des
	Inflammation and Cancer: Extra- and Intracellular Determinants of Tumor-Associated Macrophages as Tumor Promoters.	Gabor J Szebeni, Laszlo G Puskas et al. (2017) Mediators Inflamm
	Identification of A Panel of Serum microRNAs as Biomarkers for Early Detection of Lung Adenocarcinoma.	Shaogang Lv, Jiatao Lou et al. (2017) J Cancer
	Circulating microRNAs in Hepatocellular Carcinoma: Potential Diagnostic and Prognostic Biomarkers.	Hamid Reza Mirzaei, Hamed Mirzaei et al. (2016) Curr Pharm Des
	Serum miR-30e and miR-223 as Novel Noninvasive Biomarkers for Hepatocellular Carcinoma.	Sourav Bhattacharya, Ratna B Ray et al. (2016) Am J Pathol
	Circulating miR-223 in Oral Cancer: Its Potential as a Novel Diagnostic Biomarker and Therapeutic Target.	Hirohiko Tachibana, Mitsuyoshi Iino et al. (2016) PLoS One
	Circulating Serum miRNAs as Diagnostic Markers for Colorectal Cancer.	Abdel-Rahman N Zekri, Abeer A Bahnassy et al. (2016) PLoS One
	A circulating miRNA assay as a first-line test for prostate cancer screening.	Evgeniya Sharova, Vincenzo Ciminale et al. (2016) Br J Cancer
	MicroRNA-223 and microRNA-92a in stool and plasma samples act as complementary biomarkers to increase colorectal cancer detection.	Pi-Yueh Chang, Err-Cheng Chan et al. (2016) Oncotarget
	MicroRNA dysregulation and esophageal cancer development depend on the extent of zinc dietary deficiency.	Louise Y Fong, Carlo M Croce et al. (2016) Oncotarget
	Combination of miR-125b and miR-27a enhances sensitivity and specificity of AFP-based diagnosis of hepatocellular carcinoma.	Duo Zuo, Hua Guo et al. (2016) Tumour Biol
	MiR-223 targeting MAFB suppresses proliferation and migration of nasopharyngeal carcinoma cells.	Wanyong Yang, Shemin Lu et al. (2015) BMC Cancer
	Circulating microRNAs as novel prognosis biomarkers for head and neck squamous cell carcinoma.	Bo Hou, Kazuhiko Takeuchi et al. (2015) Cancer Biol Ther
	Characterization of CLL exosomes reveals a distinct microRNA signature and enhanced secretion by activation of BCR signaling.	Yuh-Ying Yeh, John C Byrd et al. (2015) Blood
	Circulating microRNA-223 serum levels do not predict sepsis or survival in patients with critical illness.	Fabian Benz, Christoph Roderburg et al. (2015) Dis Markers
	MicroRNA-223 Expression is Upregulated in Insulin Resistant Human Adipose Tissue.	Tung-Yueh Chuang, Yen-Hao Chen et al. (2015) J Diabetes Res
	Malignant potential in pancreatic neoplasm; new insights provided by circulating miR-223 in plasma.	Shuhei Komatsu, Eigo Otsuji et al. (2015) Expert Opin Biol Ther
	MicroRNA-223 delivered by platelet-derived microvesicles promotes lung cancer cell invasion via targeting tumor suppressor EPB41L3.	Hongwei Liang, Ke Zen et al. (2015) Mol Cancer
	miR223: STAT1: A Novel Target of miR-150 and miR-223 Is Involved in the Proliferation of HTLV-I-Transformed and ATL Cells.	Ramona Moles, Christophe Nicot et al. (2015) Neoplasia
	MicroRNA-223 dose levels fine tune proliferation and differentiation in human cord blood progenitors and acute myeloid leukemia.	Bernhard Gentner, Florian Kuchenbauer et al. (2015) Exp Hematol
	miRNA-223: Increased expression of circulating miRNA-93 in women with polycystic ovary syndrome may represent a novel, non-invasive biomarker for diagnosis.	T Sathyapalan, S L Atkin et al. (2015) Sci Rep
	Expression profile of circulating serum microRNAs in dogs with lymphoma.	Aki Fujiwara-Igarashi, Hajime Tsujimoto et al. (2015) Vet J
	Identification of circulating MicroRNAs as novel potential biomarkers for hepatocellular carcinoma detection: a systematic review and meta-analysis.	G Li, M He et al. (2015) Clin Transl Oncol
	[Chikusetsu saponin â…£a ameliorates myocardial hypertrophy of rats through regulating expression of miR199a-5p/Atg5].	Xue-Cui Wu, Chao-Qi Liu et al. (2021) Zhongguo Zhong Yao Za Zhi
	miR-199a-5p: Circulating microRNAs associated with C-type natriuretic peptide in childhood obesity.	Manuela Cabiati, Silvia Del Ry et al. (2020) Peptides
	Phenotypical microRNA screen reveals a noncanonical role of CDK2 in regulating neutrophil migration.	Alan Y Hsu, Qing Deng et al. (2019) Proc Natl Acad Sci U S A
	Circulating microRNAs as predictive biomarkers for liver disease progression of chronic hepatitis C (genotype-4) Egyptian patients.	Mohamed El-Hefny, Abdel Hady Abdel Wahab et al. (2019) J Med Virol
	mir-199a: Analysis of the expression of mir-34a, mir-199a, mir-30c and mir-19a in peripheral blood CD4+T lymphocytes of relapsing-remitting multiple sclerosis patients.	Nooshin Ghadiri, Mohammad Hossein Nasr-Esfahani et al. (2018) Gene
	miR-199a: Downregulation of miR-199a/b-5p is associated with GCNT2 induction upon epithelial-mesenchymal transition in colon cancer.	Chia-Chun Chao, Reiji Kannagi et al. (2017) FEBS Lett
	MiR-199a and miR-497 Are Associated with Better Overall Survival due to Increased Chemosensitivity in Diffuse Large B-Cell Lymphoma Patients.	Katharina Troppan, Alexander Deutsch et al. (2015) Int J Mol Sci
